# Supplementary material for: An environmentally responsible 3-pot, 5-step synthesis of the antitumor agent sonidegib using ppm levels of Pd catalysis in water
Source: Royal Society of Chemistry journal article supplement (doi:10.1039/c9gc03495a), 2019-01-01

## Supplementary Information

### An Environmentally Responsible 3-pot, 5-step Synthesis of the Antitumor Agent Sonidegib using ppm Levels of Pd Catalysis

Balaram S. Takale,<sup>\*a</sup> Ruchita R. Thakore,<sup>a</sup> Fan Yi Kong<sup>a,b</sup> and Bruce H. Lipshutz<sup>\*a</sup>

<sup>a</sup>Department of Chemistry and Biochemistry, University of California, Santa Barbara, California 93106, USA

<sup>b</sup>Upper Canada College, 220 Lonsdale Ave., Toronto, ON M2N 6X5, Canada

#### Table of Contents

|                                                                                                                                                                                                                                                                                                                                                                                                                                                                                                                         |                |
|-------------------------------------------------------------------------------------------------------------------------------------------------------------------------------------------------------------------------------------------------------------------------------------------------------------------------------------------------------------------------------------------------------------------------------------------------------------------------------------------------------------------------|----------------|
| <b>1. General information</b>                                                                                                                                                                                                                                                                                                                                                                                                                                                                                           | <b>S2</b>      |
| <b>2. Procedures for the synthesis of sonidegib <i>via</i> route 1:</b><br><b>2.1 S<sub>N</sub>Ar reaction</b><br>2.1.1 Screening of base<br>2.1.2 Screening of surfactants<br><b>2.2 Reduction of nitro group</b><br><b>2.3 Suzuki-Miyaura coupling</b><br>2.3.1 Screening of palladium catalysts<br>2.3.2 Screening of surfactants<br><b>2.4 Amide coupling</b><br><b>2.5 Large scale one-pot reaction</b><br>2.5.1 Synthesis of intermediate 4<br>2.5.2 Synthesis of intermediate 8<br>2.5.3 Amide coupling: route 1 | <b>S3-S11</b>  |
| <b>3 Procedures for the synthesis of sonidegib <i>via</i> route 2</b><br><b>3.1 Amide coupling</b><br><b>3.2 Late stage Suzuki-Miyaura coupling</b>                                                                                                                                                                                                                                                                                                                                                                     | <b>S11-S12</b> |
| <b>4 E Factor calculations</b>                                                                                                                                                                                                                                                                                                                                                                                                                                                                                          | <b>S12</b>     |
| <b>5 Dyanamic light scattering (DLS) charts of TPGS-750-M and Brij-30 in water</b>                                                                                                                                                                                                                                                                                                                                                                                                                                      | <b>S13</b>     |
| <b>6 Compound characterization data</b>                                                                                                                                                                                                                                                                                                                                                                                                                                                                                 | <b>S14-S15</b> |
| <b>7 NMR spectra</b>                                                                                                                                                                                                                                                                                                                                                                                                                                                                                                    | <b>S16-S19</b> |

## 1. General information

Reagents were purchased from Sigma-Aldrich, Combi-Blocks, Alfa Aeser, or Acros Organics and used without further purification. Palladium acetate was supplied generously by Johnson Matthey.  $^1\text{H}$  and  $^{13}\text{C}$  NMR spectra were recorded on either a Varian Unity Inova 400 MHz (400 MHz for  $^1\text{H}$ , 100 MHz for  $^{13}\text{C}$ ), a Varian Unity Inova 500 MHz (500 MHz for  $^1\text{H}$ , 125 MHz for  $^{13}\text{C}$ ) or on a Varian Unity Inova 600 MHz spectrometer (600 MHz for  $^1\text{H}$ ); DMSO- $d_6$ ,  $\text{CD}_3\text{OD}$ ,  $\text{CD}_3\text{CN}$  and  $\text{CDCl}_3$  were used as solvent. Residual peaks for  $\text{CHCl}_3$  in  $\text{CDCl}_3$  (1 H = 7.26 ppm,  $^{13}\text{C}$  = 77.20 ppm),  $(\text{CH}_3)_2\text{SO}$  in  $(\text{CD}_3)_2\text{SO}$  (1 H = 2.50 ppm,  $^{13}\text{C}$  = 39.52 ppm),  $\text{CH}_3\text{CN}$  in  $\text{CD}_3\text{CN}$  ( $^1\text{H}$  = 1.98 ppm,  $^{13}\text{C}$  = 0.49 and 117.47 ppm) or MeOH in MeOD ( $^1\text{H}$  = 4.78 ppm,  $^{13}\text{C}$  = 49.00 ppm) have been assigned. The chemical shifts are reported in ppm, the coupling constants  $J$  value are given in Hz. The peak patterns are indicated as follows: bs, broad singlet; s, singlet; d, doublet; t, triplet; q, quartet; p, pentet; m, multiplet. Thin layer chromatography (TLC) was performed using Silica Gel 60 F254 plates (Merck, 0.25 mm thick). Flash chromatography was done in glass columns using Silica Gel 60 (EMD, 40-63  $\mu\text{m}$ ). GCMS data were recorded on a 5975C Mass Selective Detector, coupled with a 7890A Gas Chromatograph (Agilent Technologies). Brij-30 is purchased from across organics (Catalog AC216725000). The desired 2 wt % of Brij-30 solution in HPLC water (which was degassed with argon prior to use) was prepared by dissolving 2 g of Brij-30 solid to 98 g of HPLC water and stored under argon.

## 2. Procedures for the synthesis of sonidegib *via* Route 1

### 2.1 S<sub>N</sub>Ar reaction

#### 2.1.1 Screening of base

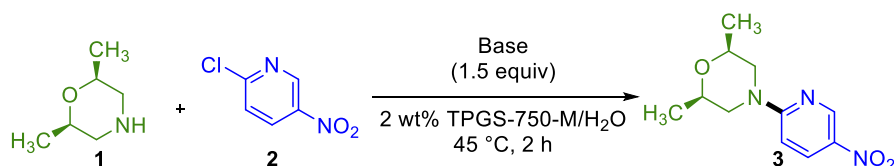

| entry          | base (1.5 equiv)                                 | conversion to <b>3</b> (%) <sup>b</sup> |
|----------------|--------------------------------------------------|-----------------------------------------|
| 1              | K <sub>3</sub> PO <sub>4</sub> .H <sub>2</sub> O | >99                                     |
| 2              | Et <sub>3</sub> N                                | 91                                      |
| 3              | K <sub>2</sub> CO <sub>3</sub>                   | 89                                      |
| 4 <sup>c</sup> | K <sub>3</sub> PO <sub>4</sub> .H <sub>2</sub> O | 45                                      |

<sup>a</sup>Reaction conditions: 0.5 mmol of **1**, 0.5 mmol of **2**, 0.75 mmol of base, stirred at 45 °C for 2.0 h;

<sup>b</sup>Determined by GC-MS; <sup>c</sup>reaction at room temperature for 24 h.

In a 1-dram vial, (2S,6R)-2,6-dimethylmorpholine **1** (0.5 mmol), 2-chloro-5-nitropyridine **2** (0.5 mmol), and base (0.75 mmol) were added. Aqueous 2 wt % TPGS-750-M solution (1.0 mL) was then added, and the vial was stirred at rt or 45 °C until completion (as monitored by TLC or GC-MS). The products were then separated by filtration, vacuum dried to give free flowing yellow powder in quantitative yield.

## 2.1.2 Screening of surfactants

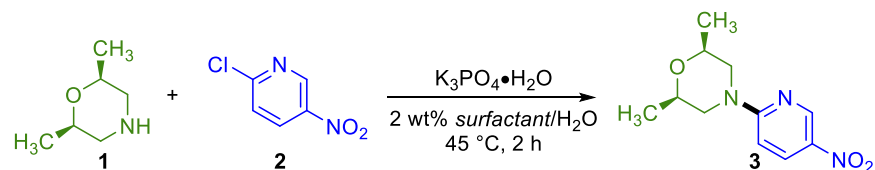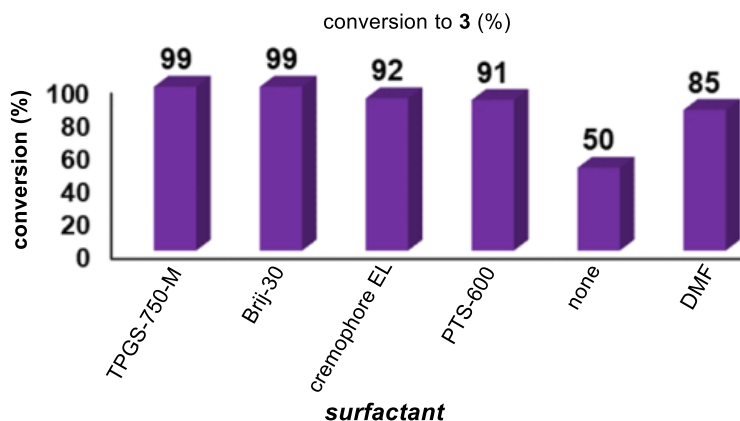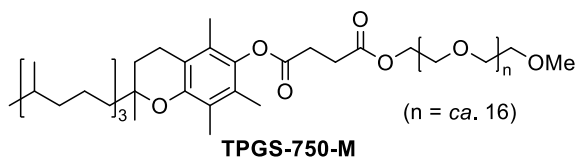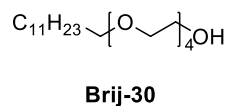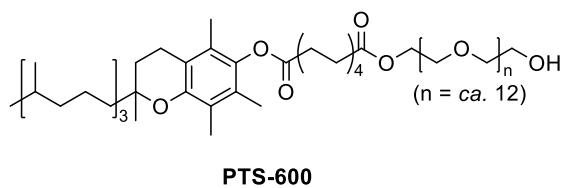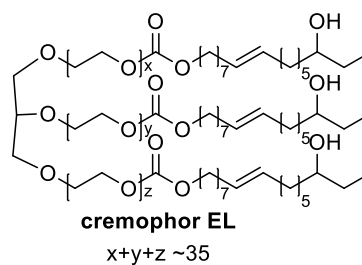

In a 1-dram vial, (2S,6R)-2,6-dimethylmorpholine **1** (0.5 mmol), 2-chloro-5-nitropyridine **2** (0.5 mmol), and  $K_3PO_4 \cdot H_2O$  (0.75 mmol) were added. Aqueous 2 wt % surfactant solution or water or DMF (1.0 mL) was added, and the vial was stirred at 45 °C for 2 h. The products were then separated by filtration, vacuum dried to give free flowing yellow powder in quantitative yield.

## 2.2 Reduction of the nitro group

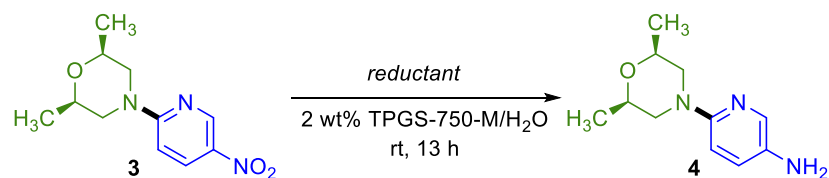

conversion to **4** (%)

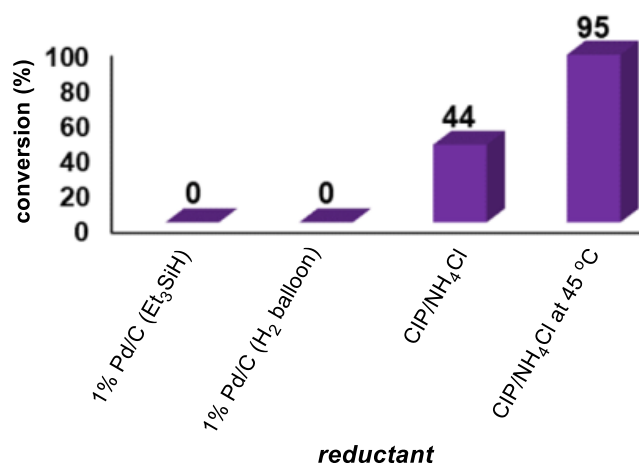

In a 1-dram vial, (2*S*,6*R*)-2,6-dimethyl-4-(5-nitropyridin-2-yl)morpholine **3** (0.5 mmol), and reducing system (1 wt % Pd/C (1.0 mol%)/ H<sub>2</sub> balloon or 1 wt % Pd/C (1.0 mol %)/ Et<sub>3</sub>SiH (3.0 equiv) or CIP (5.0 equiv)/NH<sub>4</sub>Cl (3.0 equiv) was added. Aqueous 2 wt % Brij-30 solution (1.0 mL) was then added, and the vial was stirred at rt or 45 °C until completion (as monitored by TLC or GC-MS). The reaction mixture was then extracted with EtOAc (3 x 1 mL), and the combined organic layers were evaporated to give crude product as a purple colored oil, which was analysed by GC-MS, and used subsequently without further purification.

## 2.3 Suzuki-Miyaura coupling

### 2.3.1 Screening of palladium catalysts

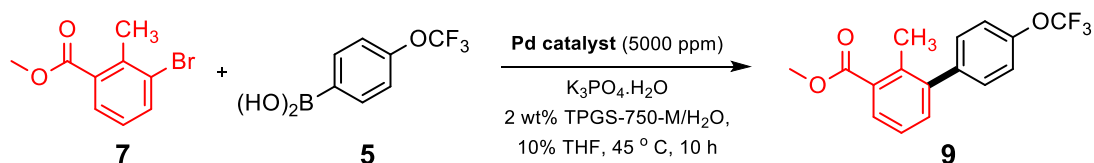

conversion to **9** (%)

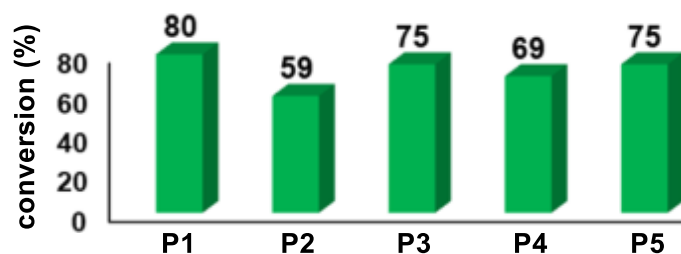

#### *Pd catalyst*

**P1** =  $Pd(OAc)_2$  :  $PPh_3$  (1:3)

**P2** =  $Pd(OAc)_2$  : SPhos (1:2)

**P3** =  $PPh_3$ -Pd-G3

**P4** =  $Pd(PPh_3)_4$

**P5** =  $Pd(PPh_3)_2Cl_2$

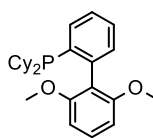

SPhos

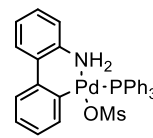

$Ph_3P$ -Pd-G3

**Preparation of a stock solution for a 0.5 mmol scale reaction.** The stock solution was prepared by dissolving 5.0 mol % of  $Pd(OAc)_2$  and 15 mol % of  $PPh_3$  in 1.0 mL of THF and stirred for 15 min at rt under an inert atmosphere. From this stock solution, 100  $\mu$ L (corresponds to 5000 ppm) of solution was used for Suzuki-Miyaura couplings.

**Coupling reaction.** In a 1-dram vial, aryl bromide **7** (0.5 mmol), boronic acid **5**, (0.55 mmol), and  $K_3PO_4 \cdot H_2O$  (0.75 mmol) were added. The vial was evacuated and backfilled with argon (this process was repeated 3 times). Catalyst stock solution as prepared above (100  $\mu$ L = 5000 ppm of Pd) was then added before addition of the

aqueous 2 wt % TPGS-750-M/H<sub>2</sub>O (0.9 mL) solution. The vial was quickly closed with a screw cap and stirred at 45 °C for 10 h. The reaction mixture was then extracted with EtOAc (3 x 1 mL). The organic solvents were removed under vacuum to give a pale-yellow oil which was then analysed for conversion using GC-MS.

### 2.3.2 Screening of surfactants

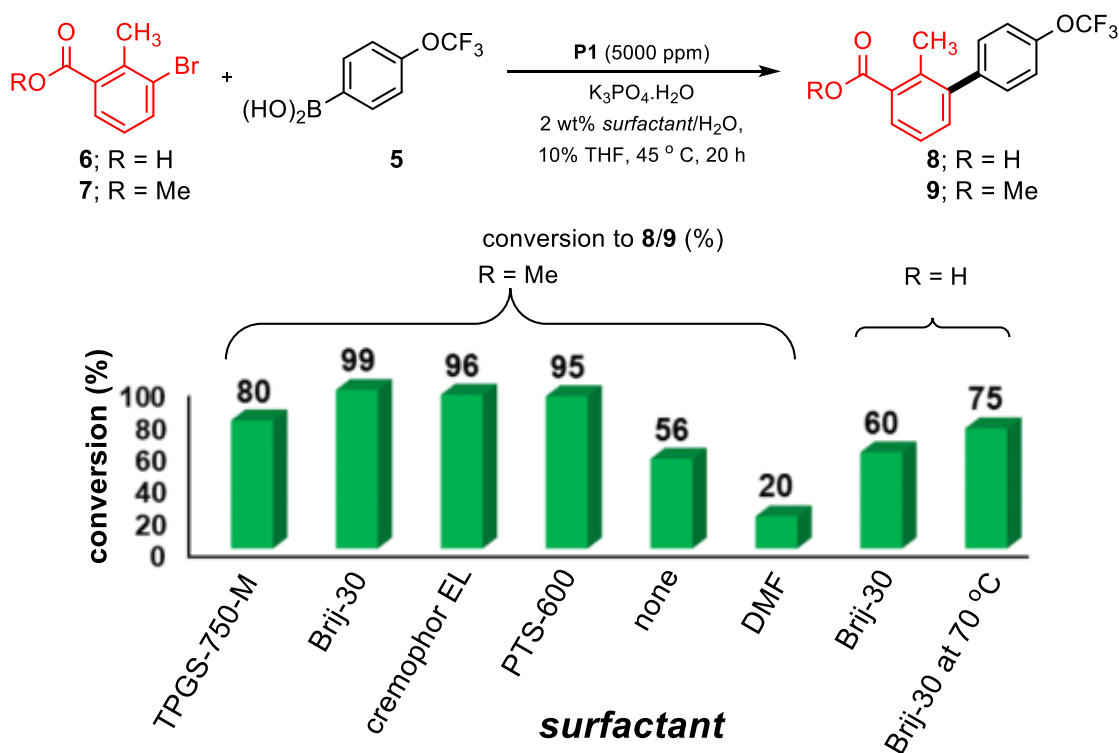

A similar procedure mentioned in **Section 2.3.1** was followed by choosing a different surfactant system or solvent.

## 2.4 Amide coupling

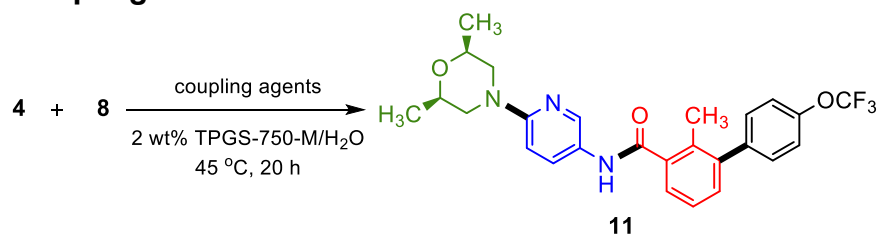

| entry          | coupling reagent                    | yield of <b>11</b> (%) <sup>b</sup> |
|----------------|-------------------------------------|-------------------------------------|
| 1              | COMU/ 2,6-lutidine                  | 40                                  |
| 2              | HATU/ <i>i</i> -Pr <sub>2</sub> EtN | 43                                  |
| 3              | HOBt/ <i>i</i> -Pr <sub>2</sub> EtN | 25                                  |
| 4 <sup>c</sup> | DCC/ DMAP                           | 61                                  |

<sup>a</sup>Reaction conditions: 0.6 mmol of **4**, 0.5 mmol of **8**, 1.2 equiv of coupling reagent (COMU/ HATU/ HOBt) or 2.0 equiv DCC, 2.0 equiv base (2,6-lutidine, *i*-Pr<sub>2</sub>EtN, or 10% DMAP; <sup>b</sup>Isolated yield.

Procedure (a): In a 1-dram vial, carboxylic acid **8** was added (0.5 mmol) followed by 2 wt % TPGS-750-M/H<sub>2</sub>O (1.0 ml) and base (2.0 equiv). The vial was screw capped and stirred for ~5 - 10 min, after which the amine **4** (1.2 equiv) was added followed by coupling reagent (1.2 equiv). The reaction was stirred at 45 °C for 20 h. The reaction mixture was then extracted with EtOAc (3 x 1 mL). The organic solvents were then removed under vacuum to give crude material which was then purified by column chromatography to give pure product **11**.

Procedure (b): In a 1-dram vial, carboxylic acid **8**, amine **4** (1.2 equiv), and 10% DMAP were added followed by 2 wt % TPGS-750-M/H<sub>2</sub>O (1.0 mL). The vial was screw capped and stirred for at 45 °C for 10 min. At this stage, 0.5 equiv of DCC was added and the stirring was continued for 1 h (this process was repeated 3 times for an additional 1.5 equiv DCC). Finally, the reaction mixture was stirred for another 15-16 h. The reaction mixture was then extracted with EtOAc (3 x 1 mL). The organic solvents were removed under vacuum to give crude material which was then purified by column chromatography to give pure product **11**.

## 2.5 Large scale one-pot reaction

### 2.5.1 Synthesis of intermediate 4

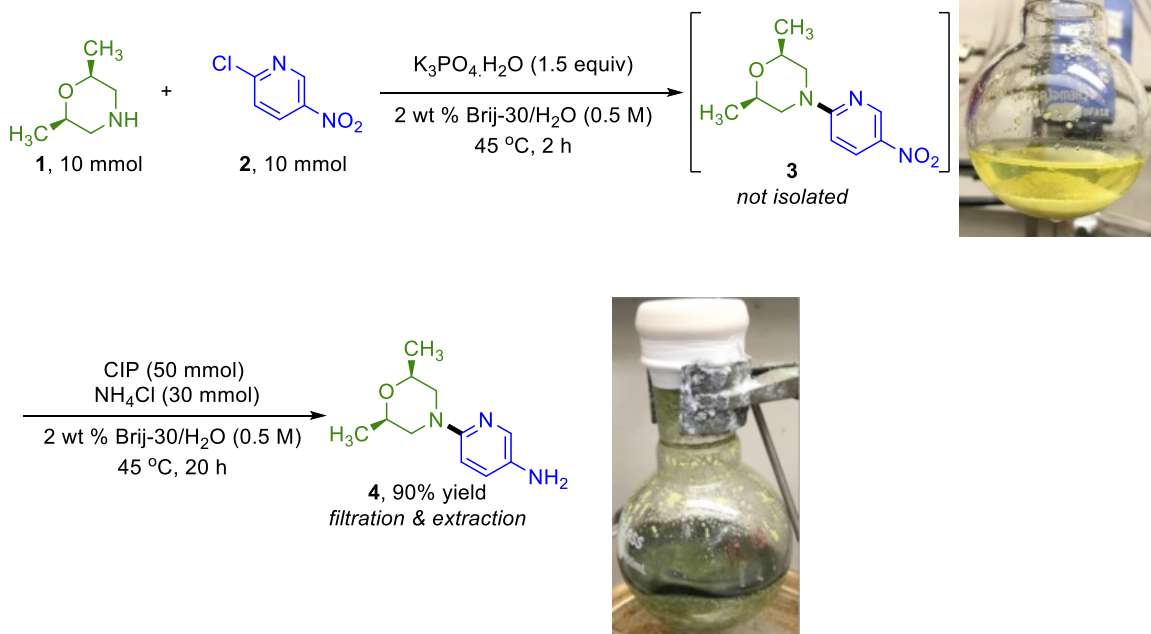

In a 100.0 mL round bottom flask, (2S,6R)-2,6-dimethylmorpholine **1** (10.0 mmol), 2-chloro-5-nitropyridine **2** (10.0 mmol), and  $K_3PO_4 \cdot H_2O$  (1.5 equiv) were added. Aqueous 2 wt % Brij-30/ $H_2O$  solution (20 mL) was added, and the round bottom flask was capped with a rubber septum and the reaction was stirred at 45 °C for 2 h allowing the formation of  $S_NAr$  product **3** (yellow solid). Later in the same pot, CIP (50.0 mmol) and  $NH_4Cl$  (30.0 mmol) were added and the reaction was stirred at 45 °C for 20 h. The product was then separated through filtration followed by extraction using EtOAc (4 x 15 mL). The extracts were combined and then evaporated to give pure amine **4** as a purple colored oil in 90% yield which was analysed by GC-MS.

## 2.5.2 Synthesis of intermediate 8

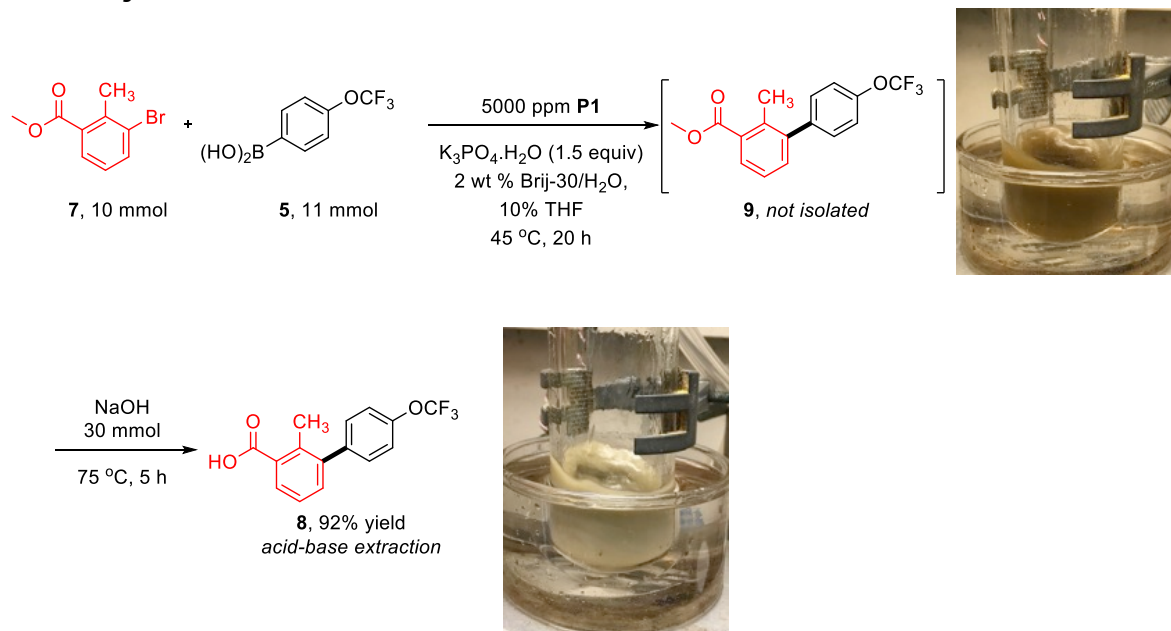

**Preparation of stock solution for a 10.0 mmol scale reaction.** The stock solution was prepared by dissolving 5000 ppm of  $Pd(OAc)_2$  and 15000 of  $PPh_3$  in 2.0 mL of THF and then stirred for 15 min at rt under inert atmosphere. This stock solution was used for large scale Suzuki-Miyaura couplings.

In a 150 mL Schlenk tube, aryl bromide **7** (10.0 mmol), boronic acid **5**, (11.0 mmol), and  $K_3PO_4 \cdot H_2O$  (1.5 equiv) were added. The flask was evacuated and backfilled with argon (this process was repeated 3 times). Catalyst stock solution as prepared above (2.0 mL = 5000 ppm of Pd) was then added before addition of aqueous 2 wt % Brij-30/ $H_2O$  (18.0 mL) solution. The reaction was allowed to stir at 45 °C for 20 h under argon (monitored by TLC). Later in the same reaction pot, 30.0 mmol of NaOH was added and the reaction was stirred at 75 °C for 5.0 h (monitored by TLC). The reaction mixture was then acidified using 2 M HCl (pH = 2) in an ice bath to get crude product, which was recrystallized from ethanol (~50 mL) to provide a white solid (92% yield).

### 2.5.3 Amide coupling: Route 1

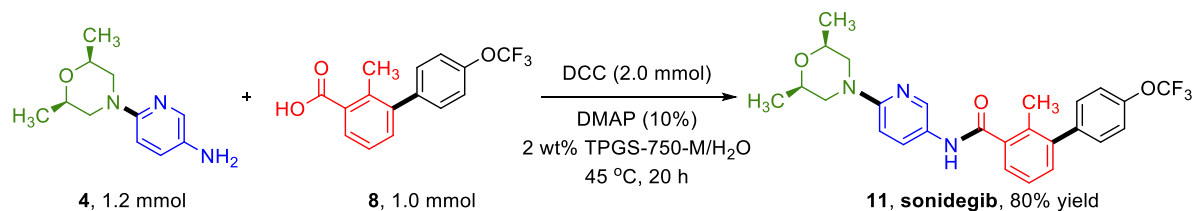

In a 10 mL round bottom flask, carboxylic acid **8** (1.0 mmol), amine **4** (1.0 mmol), and 10% DMAP were added followed by 2 wt % TPGS-750-M/H<sub>2</sub>O (2.0 ml). The vial was screw capped and stirred for at 45 °C for 10 min. At this stage 0.5 equiv of DCC was added and the stirring was continued for 1 h (this process was repeated 3 times for an additional 1.5 equiv DCC). Finally, the reaction mixture was stirred for another 15-16 h (monitored by TLC). The reaction mixture was then extracted with EtOAc (3 x 1 mL). The organic solvents were removed under vacuum to give crude material which was then purified by column chromatography to give pure product **11** in 80% yield.

### 3. Procedures for the synthesis of sonidegib *via* Route 2:

#### 3.1 Amide coupling

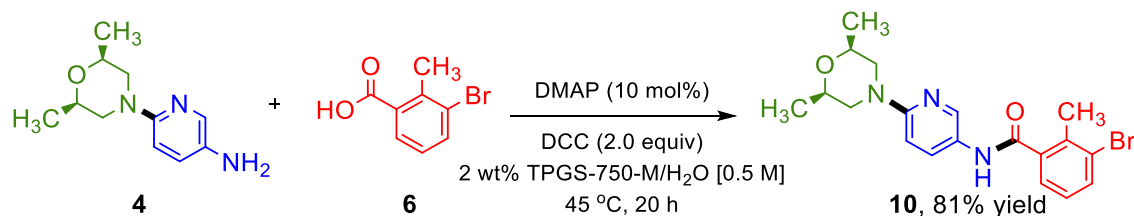

In a 1-dram screw cap glass vial, carboxylic acid **6** (1.0 mmol), amine **4** (1.2 mmol), and 10% DMAP were added followed by 2 wt % TPGS-750-M/H<sub>2</sub>O (2.0 ml). The vial was screw capped and stirred for at 45 °C for 10 min. At this stage 0.5 equiv of DCC was added and the stirring was continued for 1 h (this process was repeated 3 times for an additional 1.5 equiv DCC). Finally, the reaction mixture was stirred for another

15-16 h (monitored by TLC). The reaction mixture was then extracted with EtOAc (3 x 1 mL). The organic solvent was removed under vacuum to give crude material which was then purified by column chromatography to give pure product **10** in 81% yield.

### 3.2 Late stage Suzuki-Miyaura coupling

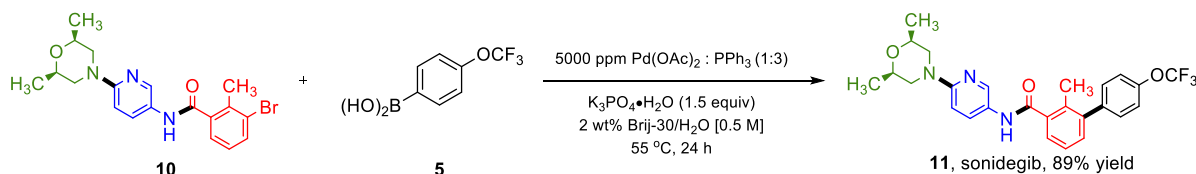

In a 1-dram vial, aryl bromide **10** (0.5 mmol), boronic acid **5**, (0.55 mmol), and K<sub>3</sub>PO<sub>4</sub>•H<sub>2</sub>O (1.5 equiv) were added. The vial was evacuated and backfilled with argon (this process was repeated 3 times). Catalyst stock solution as prepared above (100 µL = 5000 ppm of Pd) was then added before addition of aqueous 2 wt % Brij-30/H<sub>2</sub>O (1.0 mL) solution. The vial was quickly closed with a screw cap, and stirred at 55 °C for 24 h (monitored by TLC). The reaction mixture was then extracted with EtOAc (4 x 1 mL). The organic solvents were combined and then removed under vacuum and the crude material was purified by column chromatography to give pure product **11** in 89% yield.

### 4. E Factor calculations

$$\text{E Factor} = \frac{(\text{g}) \text{ of waste}}{(\text{g}) \text{ of product}} = \frac{0.988}{0.216} = 4.57$$

*Micellar conditions*

$$\text{E Factor} = \frac{(\text{g}) \text{ of waste}}{(\text{g}) \text{ of product}} = \frac{5.100}{0.183} = 27.9$$

*literature conditions*

## 5. Dynamic light scattering (DLS) charts of TPGS-750-M and Brij-30 in water

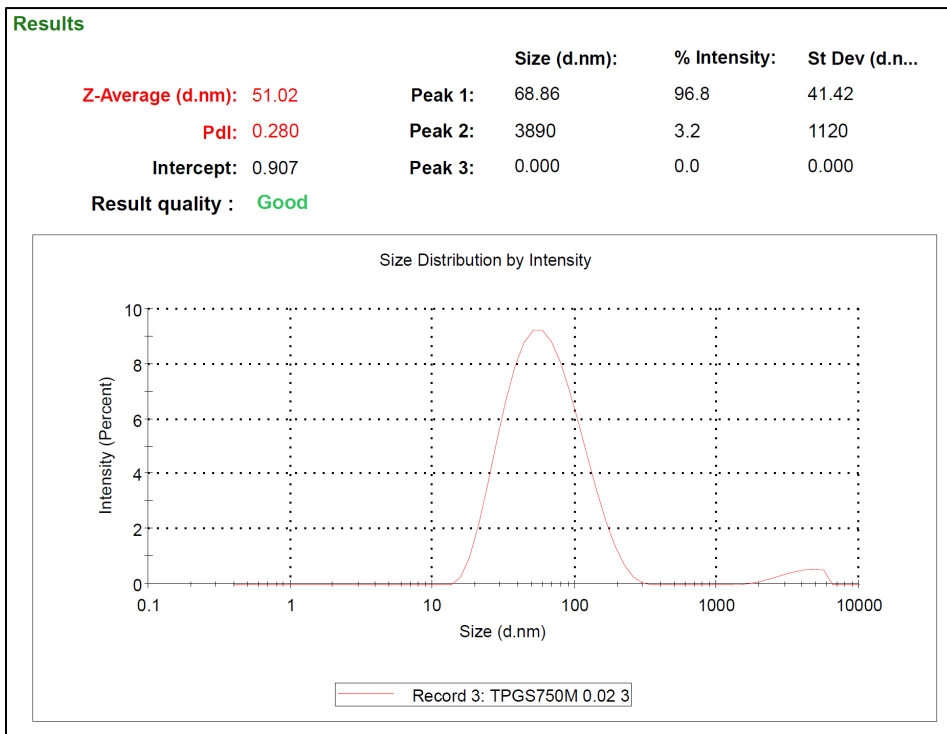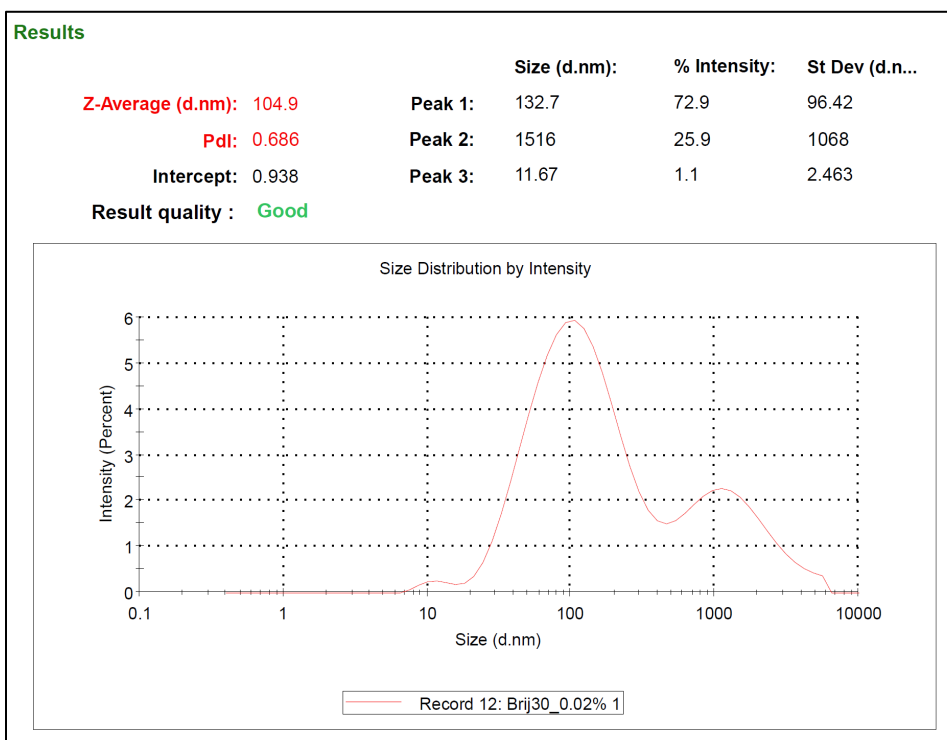

## 6. Compound characterization data

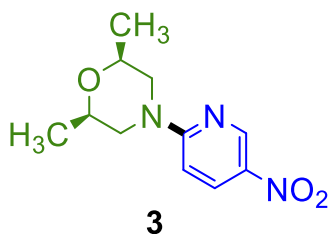

**(2S,6R)-2,6-Dimethyl-4-(5-nitropyridin-2-yl)morpholine:** yellow solid.

**<sup>1</sup>H NMR** (500 MHz, chloroform-*d*)  $\delta$  9.03 (s, 1H), 8.21 (d, *J* = 9.5 Hz, 1H), 7.28 (s, 0H), 6.57 (d, *J* = 9.5 Hz, 2H), 4.30 (d, *J* = 11.8 Hz, 5H), 3.68 (s, 1H), 2.86 – 2.51 (m, 3H), 1.28 (s, 5H).

**<sup>13</sup>C NMR** (126 MHz, chloroform-*d*)  $\delta$  160.14, 146.36, 135.16, 133.03, 104.58, 71.51, 50.16, 18.85.

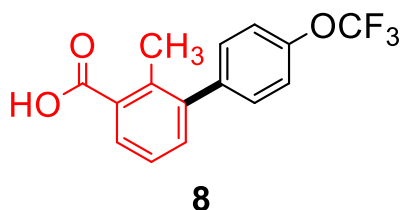

**2-Methyl-4'-(trifluoromethoxy)-[1,1'-biphenyl]-3-carboxylic acid:** white solid,

**<sup>1</sup>H NMR** (500 MHz, chloroform-*d*)  $\delta$  8.06 (d, *J* = 7.8 Hz, 1H), 7.55 – 7.02 (m, 7H), 3.68 (s, 0H), 2.51 (s, 2H), 1.27 (s, 0H).

**<sup>13</sup>C NMR** (126 MHz, chloroform-*d*)  $\delta$  173.48, 148.46, 142.62, 140.04, 137.94, 134.25, 130.77, 130.74, 129.97, 125.50, 18.73.

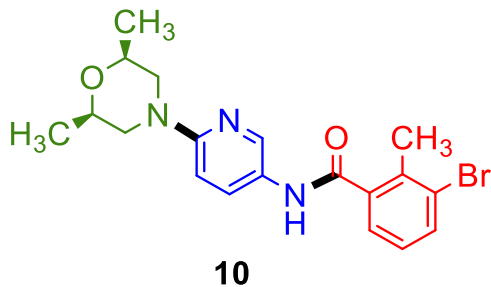

**3-Bromo-N-(6-((2*R*,6*S*)-2,6-dimethylmorpholino)pyridin-3-yl)-2-methylbenzamide:** white solid

**<sup>1</sup>H NMR** (500 MHz, chloroform-*d*) δ 8.20 (s, 1H), 8.02 (d, *J* = 8.8 Hz, 1H), 7.65 (d, *J* = 7.7 Hz, 1H), 7.46 – 7.32 (m, 2H), 7.12 (t, *J* = 7.7 Hz, 1H), 6.67 (d, *J* = 9.0 Hz, 1H), 4.01 (d, *J* = 12.3 Hz, 2H), 3.81 – 3.64 (m, 2H), 2.61 – 2.44 (m, 5H), 1.35 – 1.21 (m, 6H).

**<sup>13</sup>C NMR** (126 MHz, chloroform-*d*) δ 167.51, 156.86, 140.11, 138.41, 135.81, 134.34, 131.30, 127.21, 126.86, 125.65, 125.40, 106.92, 71.55, 51.15, 20.13, 19.01.

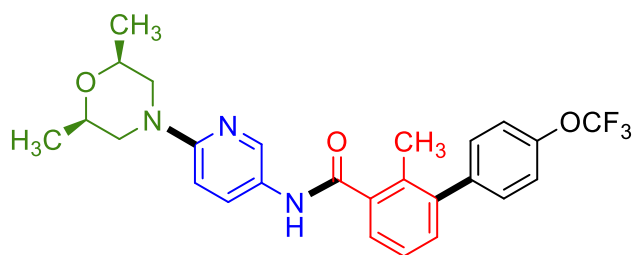

11

**N-(6-((2*R*,6*S*)-2,6-Dimethylmorpholino)pyridin-3-yl)-2-methyl-4'-(trifluoromethoxy)-[1,1'-biphenyl]-3-carboxamide:** light pink solid

**<sup>1</sup>H NMR** (500 MHz, chloroform-*d*) δ 8.22 (d, *J* = 2.7 Hz, 1H), 8.03 (dd, *J* = 9.1, 2.7 Hz, 1H), 7.69 (s, 1H), 7.47 – 7.42 (m, 1H), 7.33 – 7.24 (m, 6H), 6.66 (d, *J* = 9.1 Hz, 1H), 3.99 (d, *J* = 12.2 Hz, 2H), 3.73 (ddt, *J* = 10.0, 6.2, 3.2 Hz, 2H), 2.55 – 2.46 (m, 2H), 2.31 (s, 3H), 1.27 (d, *J* = 6.2 Hz, 6H).

**<sup>13</sup>C NMR** (126 MHz, chloroform-*d*) δ 168.72, 156.80, 148.46, 142.20, 140.18, 139.85, 137.57, 133.41, 131.62, 131.38, 130.60, 126.05, 125.84, 125.68, 120.72, 106.97, 71.55, 51.19, 18.98, 17.62.

**HRMS:** C<sub>26</sub>H<sub>26</sub>F<sub>3</sub>N<sub>3</sub>O<sub>3</sub>Na ESI-MS [*M*+Na] calcd: 508.1824; found: 508.1810.

## 7. NMR spectra's

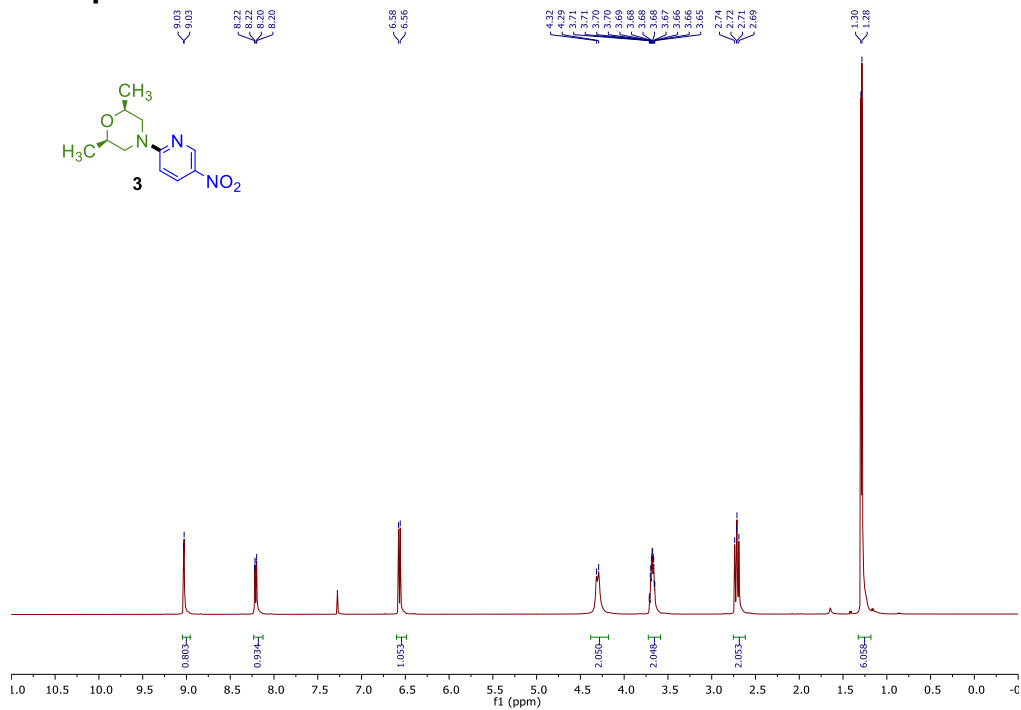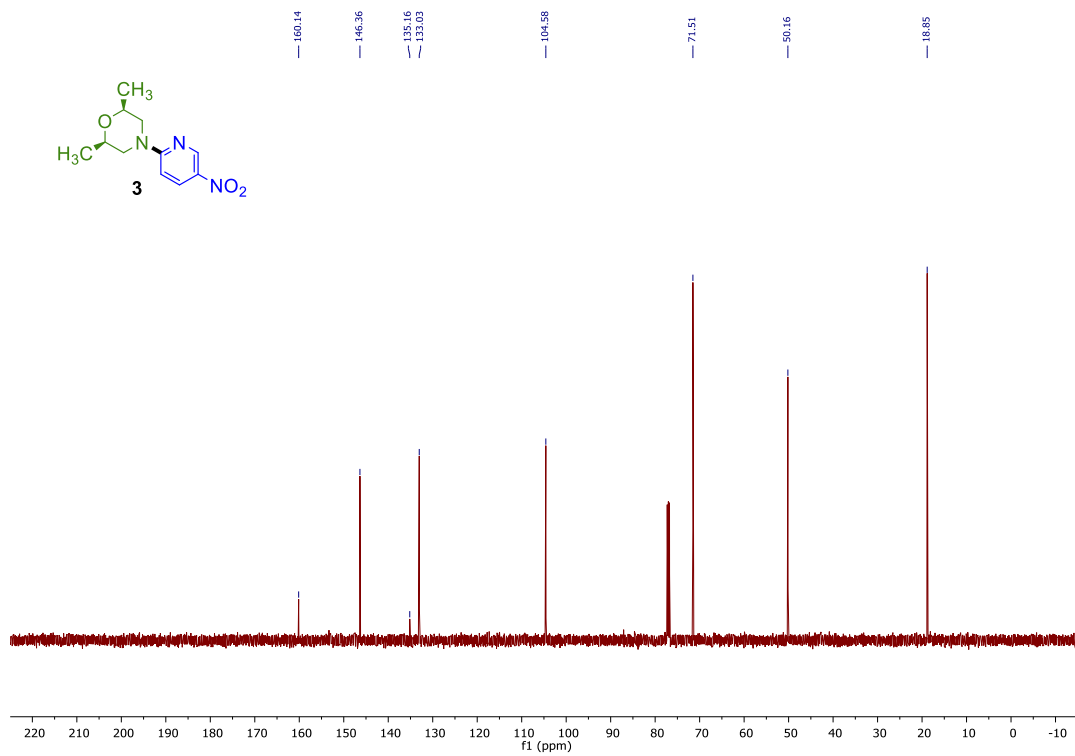

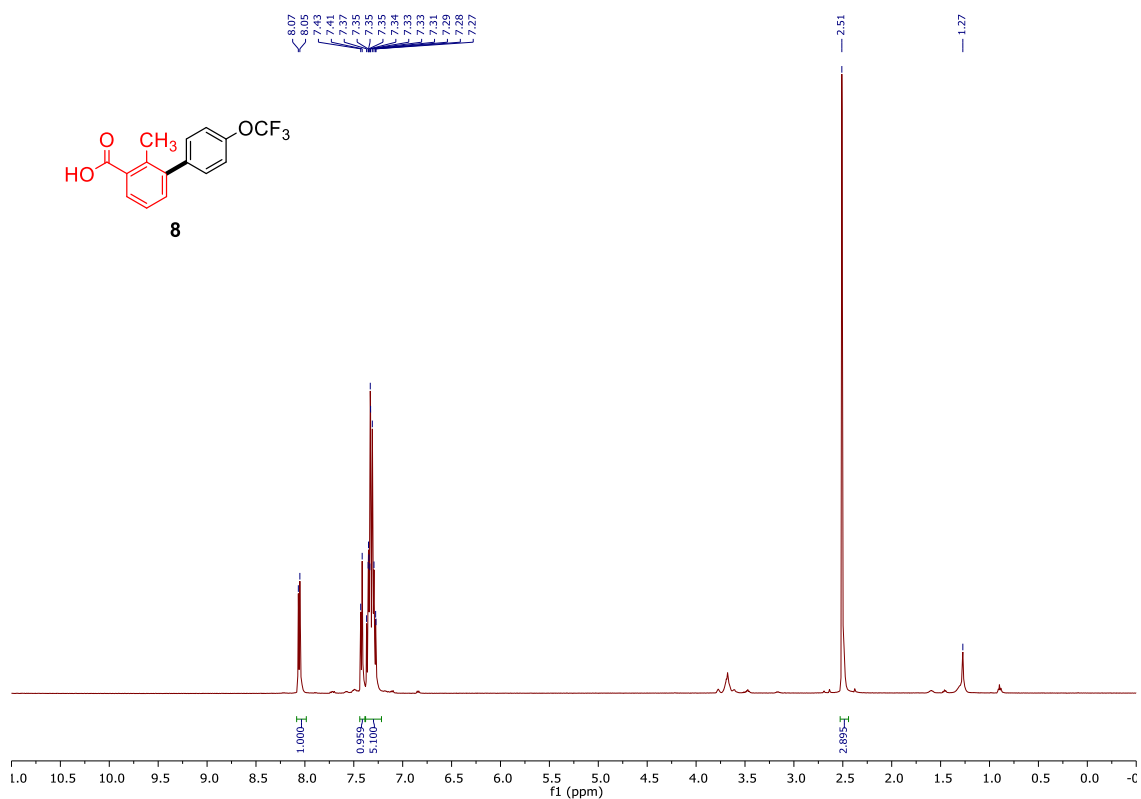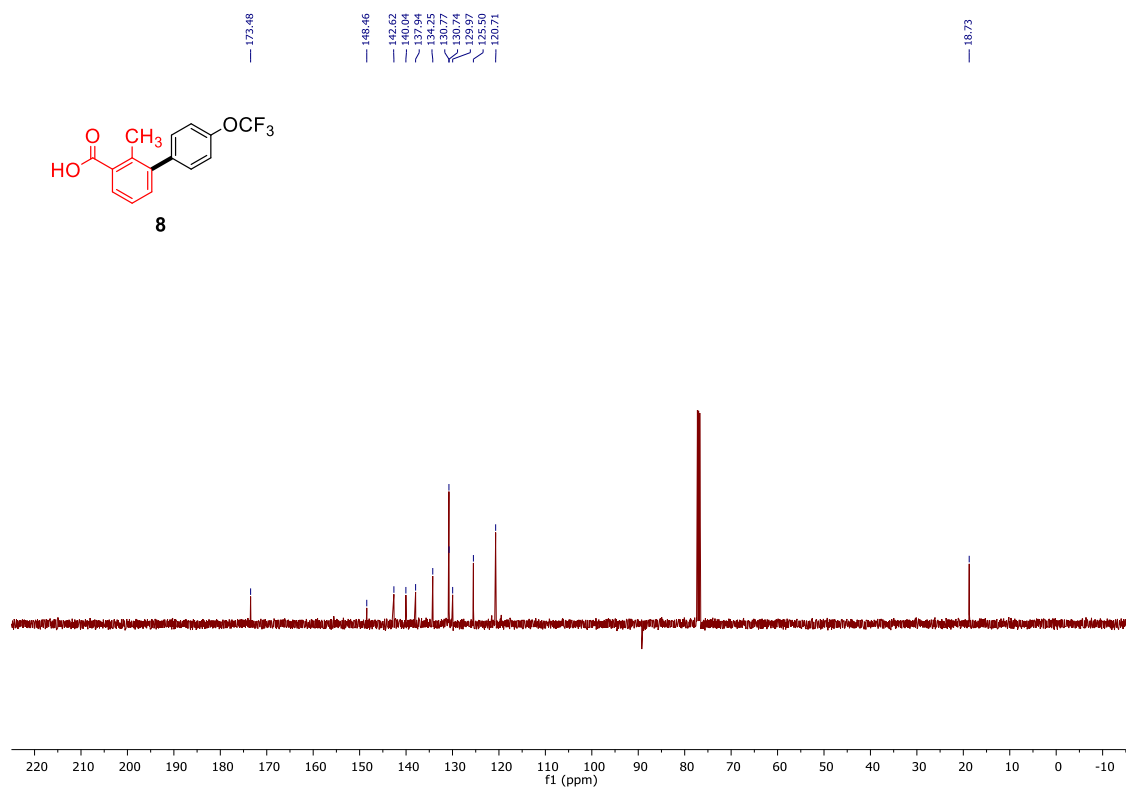

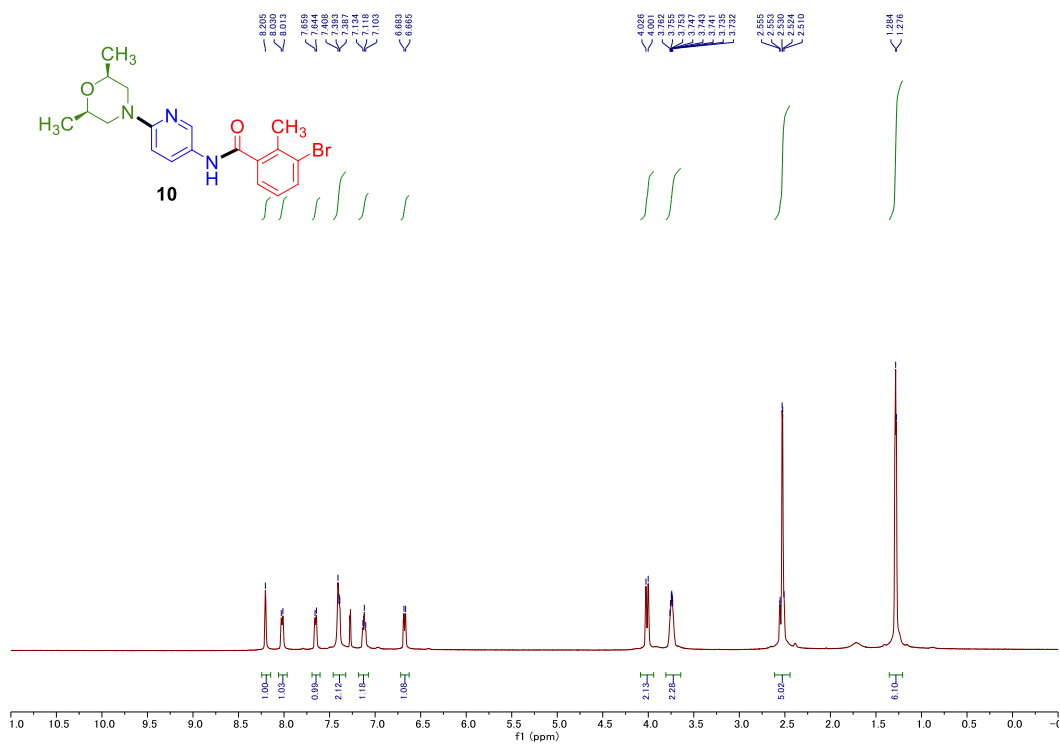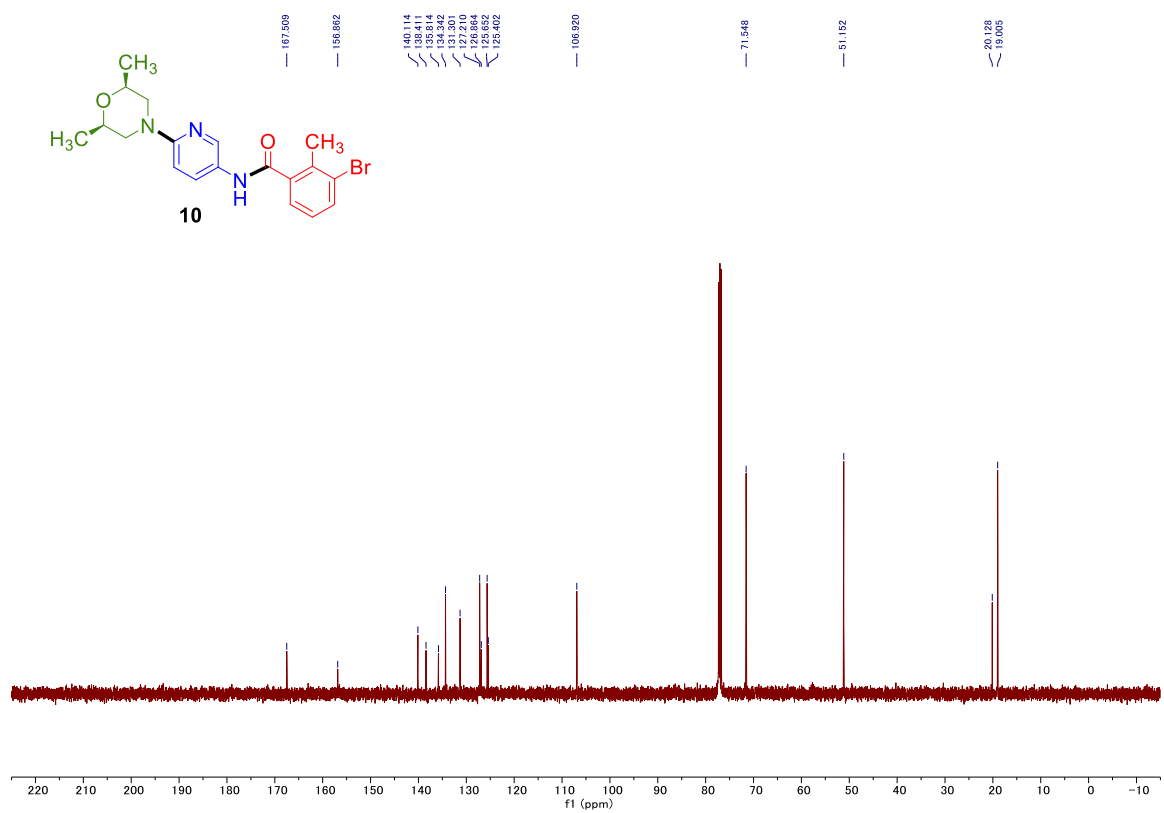

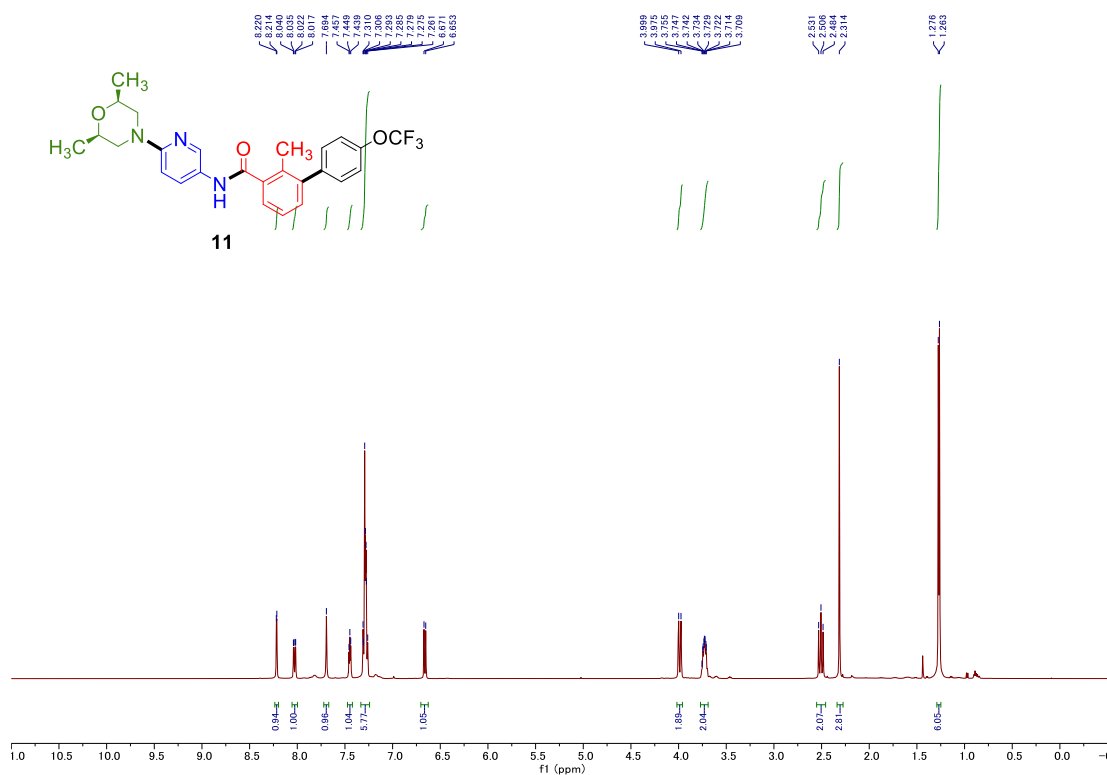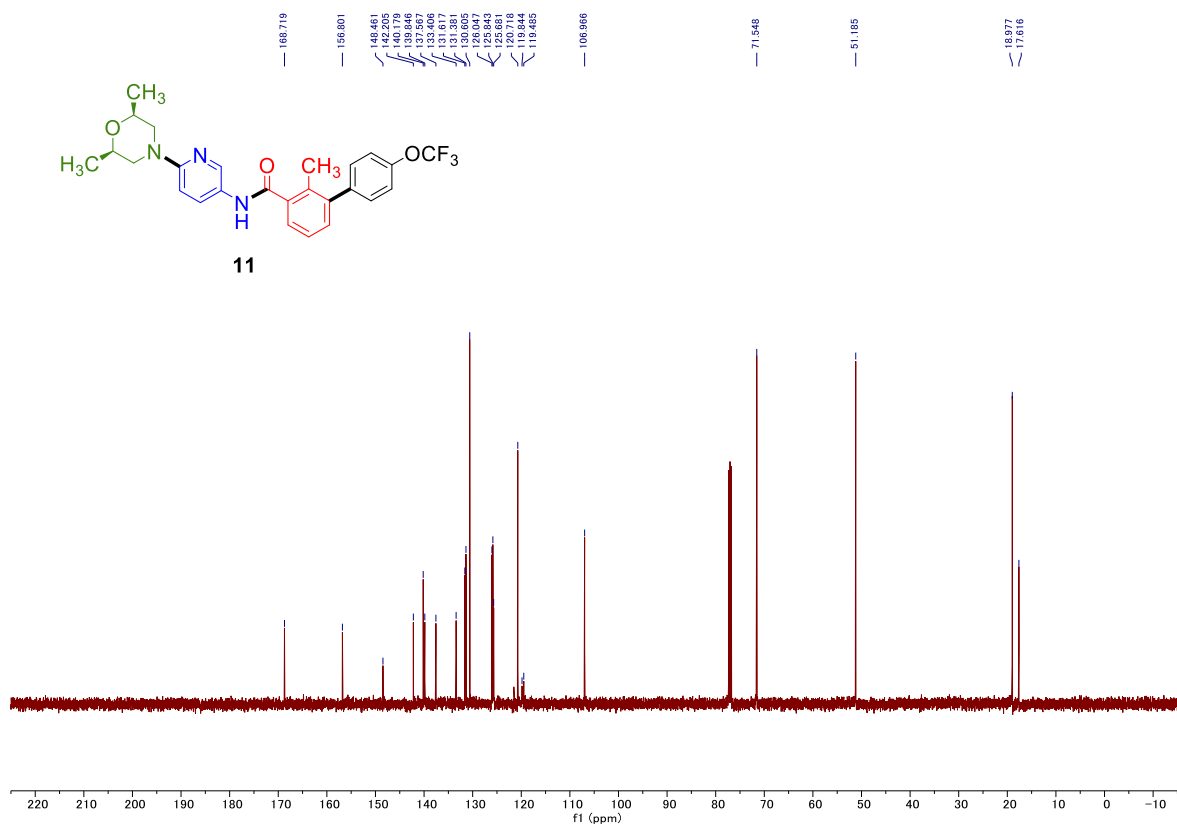

Supplement: c9gc03495a1.pdf [file c9gc03495a1.pdf]
